# Supplementary material for: First-principles study on thermodynamic stability of the hybrid interfacial structure of LiMn2O4 cathode and carbonate electrolyte in Li-ion batteries
Source: Royal Society of Chemistry journal article supplement (doi:10.1039/c7cp08037a), 2018-01-01

# First-Principles Study on Thermodynamic Stability of Hybrid Interfacial Structure of $\text{LiMn}_2\text{O}_4$ Cathode and Carbonate Electrolyte in Li-Ion Battery

Daehyeon Choi, Joonhee Kang, Jinwoo Park and Byungchan Han

## *Supplementary information*

**Fig. S1:** Determining the vacuum level through the electrostatic potential energy of  $\text{Li}_x\text{Mn}_2\text{O}_4$

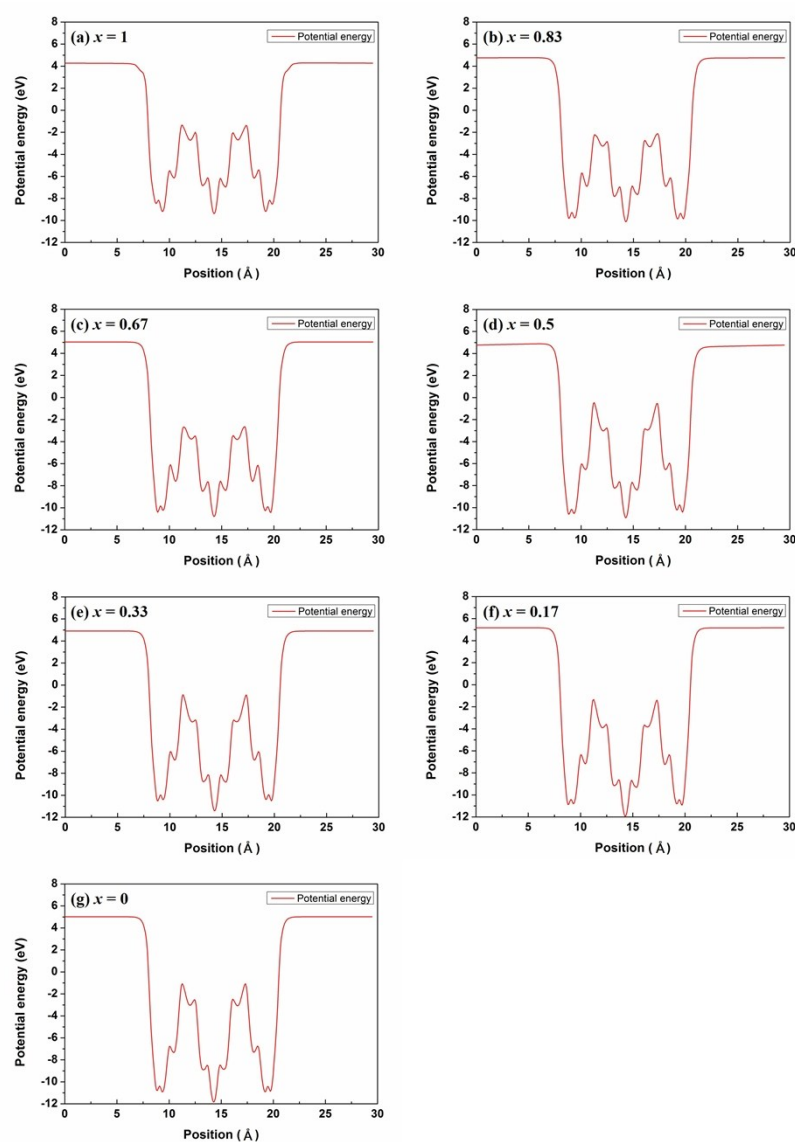

surface models

**Fig. S2:** (a) Choosing the outermost layers of LMO (111) surface model for pDOS calculation; (b) Left panel is pDOS for Mn and O from the outermost layers and right panel is pDOS summing it up without spin consideration

(a)

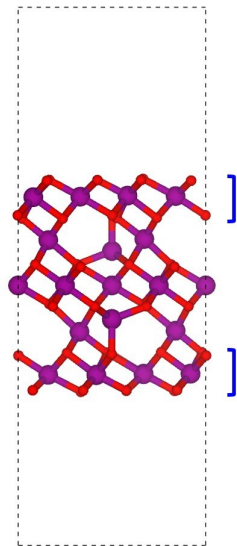

3 Layers: two O layers and one Mn layer  
 $\rightarrow$  Total 6 layers for pDOS

(b)

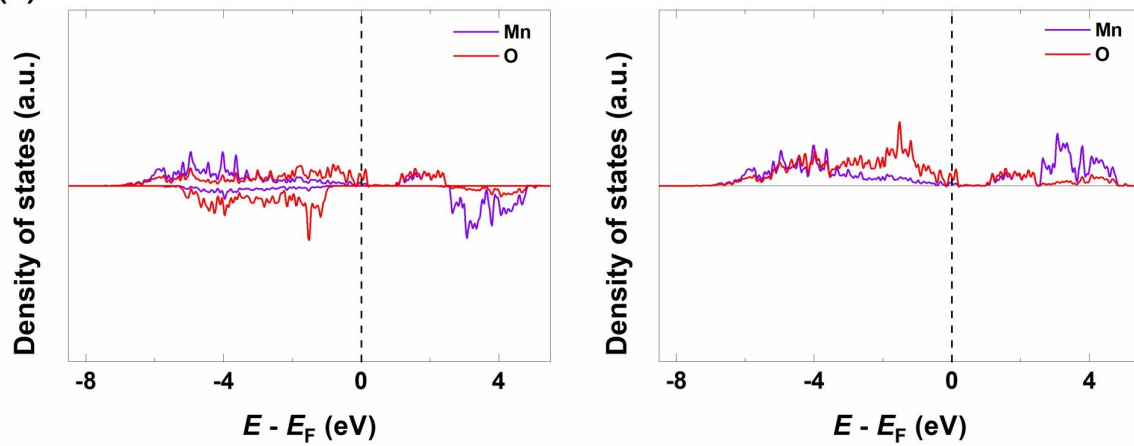

**Fig. S3:** Analyzing work function from the electrostatic potential of proton transferred LMO surface and its model system

(a)

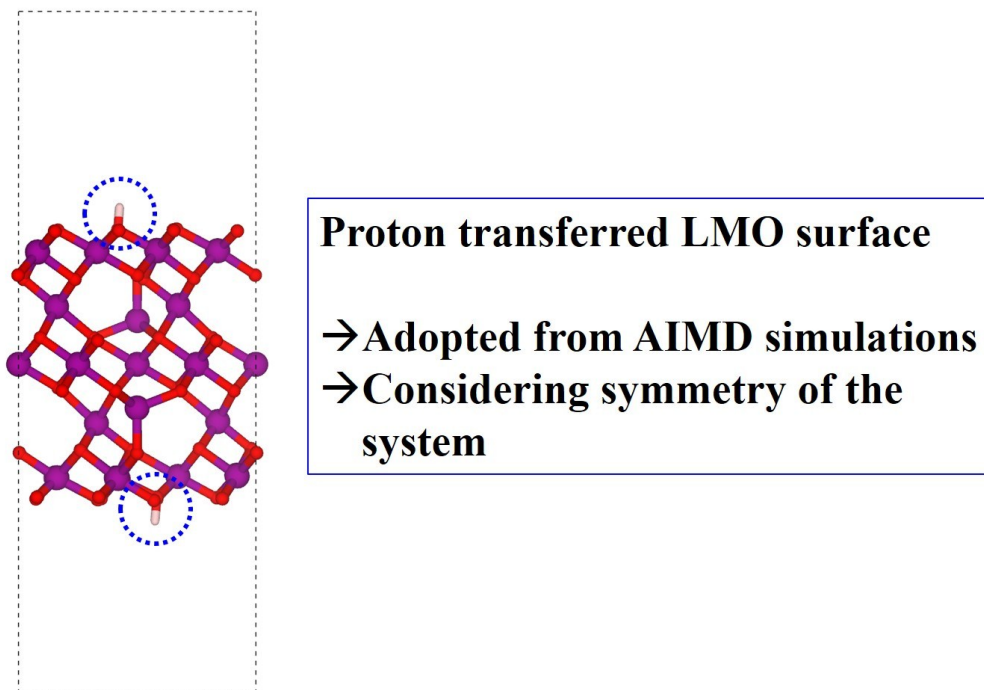

(b)

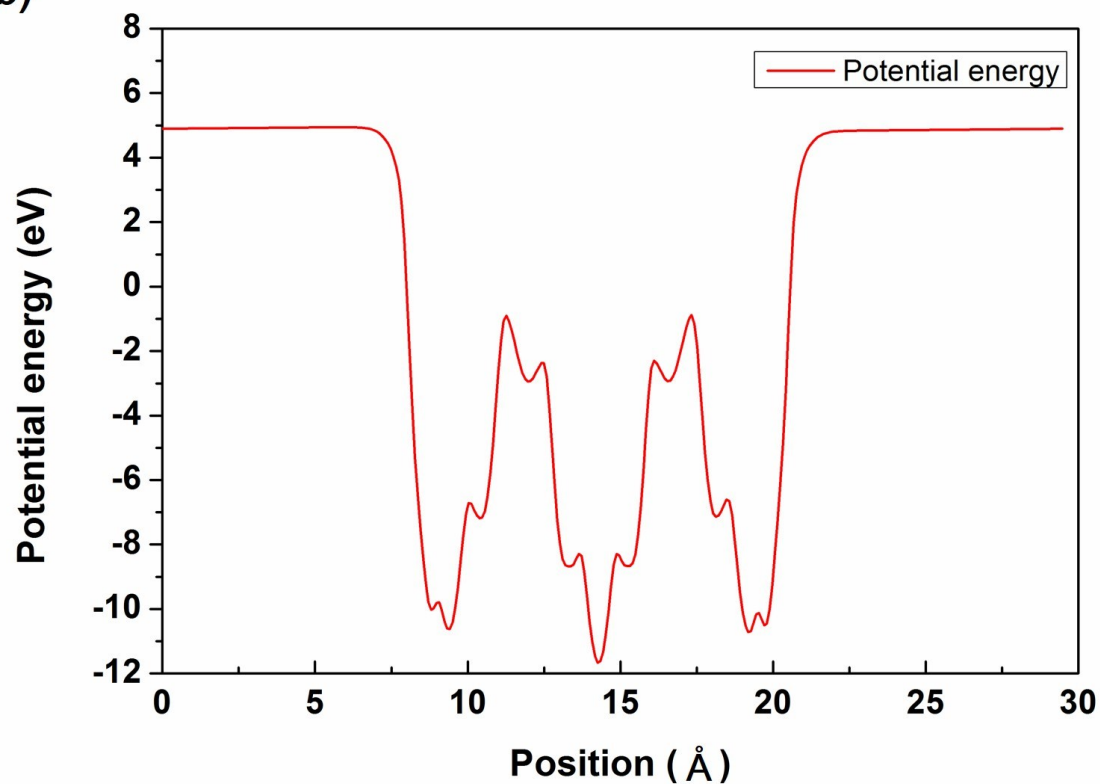

**Fig. S4:** Expanded model systems of LMO surface to investigate effect of surface coverage of proton on the work function in (a) and in (b) calculated work functions of LMO as a function of proton coverage with respect to total adsorption sites.

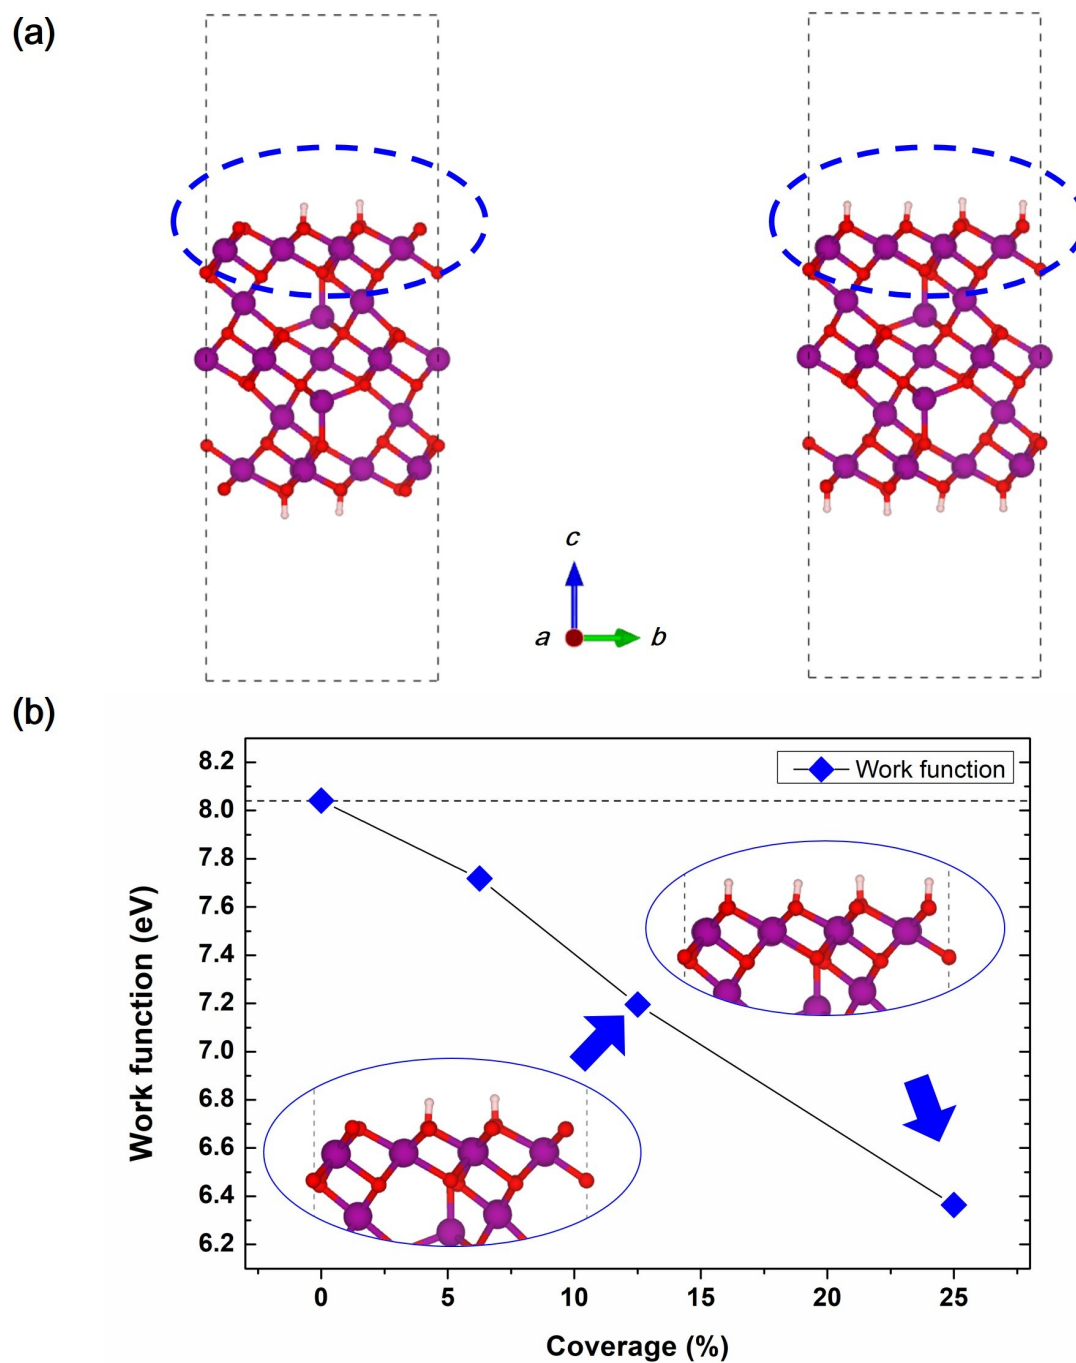

Supplement: c7cp08037a1.pdf [file c7cp08037a1.pdf]
